# Supplementary material for: An alternative interpretation of &lt;i&gt;Peltochelys duchastelii&lt;/i&gt; as a paracryptodire
Source: Copernicus journal article supplement (doi:10.5194/fr-23-83-2020), 2020-05-14
Supplement: Supplementary file 1 [file fr-23-83-2020-supplement.zip]

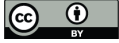

## *Supplement of*

# **An alternative interpretation of *Peltochelys duchastelii* as a paracryptodire**

**Walter G. Joyce and Yann Rollot**

*Correspondence to:* Walter G. Joyce ([walter.joyce@unifr.ch](mailto:walter.joyce@unifr.ch))

- [fr-23-83-2020-supplement-title-page.pdf](#)
- [Gaffney et al. 2007 + Peltochelys.nex](#)
- [Joyce 2007 + Peltochelys.nex](#)
- [Lyson and Joyce 2019 + Peltochelys.nex](#)

The copyright of individual parts of the supplement might differ from the CC BY 4.0 License.
